# Supplementary material for: Variable retention harvesting influences belowground plant-fungal interactions of Nothofagus pumilio seedlings in forests of southern Patagonia
Source: PeerJ. 2018 Jul 6;6:e5008. doi: 10.7717/peerj.5008 (PMC6037133; doi:10.7717/peerj.5008)
Supplement: Supplemental Information 2 — Each data point provides the raw data assoicated with each seedling harvested in aggregate retention, dispersed retnetnion, or primary forest stands. [file peerj-06-5008-s005.csv]

Habitat	Site	Transect	Seedling	root.col	age	biomass.g	herbivory
Primary Forest	Primary Forest 1	1	1	1	5	0.06025	yes
Primary Forest	Primary Forest 1	1	2	0.6	4	0.05192	yes
Primary Forest	Primary Forest 1	1	3	1	4	0.04418	yes
Primary Forest	Primary Forest 1	1	4	0.875	5	0.05021	yes
Primary Forest	Primary Forest 1	1	5	1	5	0.02665	yes
Primary Forest	Primary Forest 1	1	6	0.75	4	0.02019	yes
Primary Forest	Primary Forest 1	1	7	0.85	5	0.06202	yes
Primary Forest	Primary Forest 1	1	8	0.75	5	0.02769	yes
Primary Forest	Primary Forest 1	1	9	1	4	0.0599	yes
Primary Forest	Primary Forest 1	1	10	1	4	0.04909	yes
Primary Forest	Primary Forest 1	2	1	1	4	0.03395	yes
Primary Forest	Primary Forest 1	2	2	1	2	0.02214	yes
Primary Forest	Primary Forest 1	2	3	1	3	0.025	no
Primary Forest	Primary Forest 1	2	4	1	5	0.06725	yes
Primary Forest	Primary Forest 1	2	5	1	5	0.09341	yes
Primary Forest	Primary Forest 1	2	6	1	4	0.03642	yes
Primary Forest	Primary Forest 1	2	7	1	4	0.04105	yes
Primary Forest	Primary Forest 1	2	8	1	6	0.06039	yes
Primary Forest	Primary Forest 1	2	9	1	4	0.03599	yes
Primary Forest	Primary Forest 1	2	10	1	6	0.07653	yes
Primary Forest	Primary Forest 1	3	1	1	5	0.06919	yes
Primary Forest	Primary Forest 1	3	2	1	3	0.02745	yes
Primary Forest	Primary Forest 1	3	3	1	3	0.04245	yes
Primary Forest	Primary Forest 1	3	4	1	4	0.05182	yes
Primary Forest	Primary Forest 1	3	5	0.846153846	8	0.1356	yes
Primary Forest	Primary Forest 1	3	6	1	6	0.12614	yes
Primary Forest	Primary Forest 1	3	7	1	4	0.08125	yes
Primary Forest	Primary Forest 1	3	8	0.8	3	0.04132	yes
Primary Forest	Primary Forest 1	3	9	1	5	0.04399	yes
Primary Forest	Primary Forest 1	3	10	1	10	0.05051	no
Primary Forest	Primary Forest 2	4	1	1	5	0.0709	no
Primary Forest	Primary Forest 2	4	2	1	3	0.06016	yes
Primary Forest	Primary Forest 2	4	3	1	4	0.03656	yes
Primary Forest	Primary Forest 2	4	4	1	4	0.05453	no
Primary Forest	Primary Forest 2	4	5	1	5	0.06405	no
Primary Forest	Primary Forest 2	4	6	0.916666667	4	0.08563	yes
Primary Forest	Primary Forest 2	4	7	1	4	0.04582	yes
Primary Forest	Primary Forest 2	4	8	1	4	0.0497	yes
Primary Forest	Primary Forest 2	4	9	1	4	0.05058	yes
Primary Forest	Primary Forest 2	4	10	1	5	0.12196	yes
Primary Forest	Primary Forest 2	5	1	1	6	0.15324	yes
Primary Forest	Primary Forest 2	5	2	1	4	0.05086	no
Primary Forest	Primary Forest 2	5	3	0.846153846	5	0.05576	no
Primary Forest	Primary Forest 2	5	4	1	5	0.06188	no
Primary Forest	Primary Forest 2	5	5	1	4	0.07249	yes
Primary Forest	Primary Forest 2	5	6	1	5	0.05612	yes
Primary Forest	Primary Forest 2	5	7	1	3	0.02993	no
Primary Forest	Primary Forest 2	5	8	1	4	0.0543	yes
Primary Forest	Primary Forest 2	5	9	1	5	0.04949	yes
Primary Forest	Primary Forest 2	5	10	1	4	0.03915	yes
Primary Forest	Primary Forest 2	6	1	1	8	0.08199	yes
Primary Forest	Primary Forest 2	6	2	0.923076923	5	0.08482	no
Primary Forest	Primary Forest 2	6	3	0.9	5	0.09375	yes
Primary Forest	Primary Forest 2	6	4	1	4	0.06329	yes
Primary Forest	Primary Forest 2	6	5	0.956521739	4	0.09432	no
Primary Forest	Primary Forest 2	6	6	1	4	0.13326	yes
Primary Forest	Primary Forest 2	6	7	1	5	0.06927	yes
Primary Forest	Primary Forest 2	6	8	1	4	0.06725	yes
Primary Forest	Primary Forest 2	6	9	1	4	0.11368	yes
Primary Forest	Primary Forest 2	6	10	1	4	0.06469	no
Primary Forest	Primary Forest 2	7	1	0.857142857	6	0.09422	yes
Primary Forest	Primary Forest 2	7	2	1	4	0.06079	yes
Primary Forest	Primary Forest 2	7	3	0.888888889	6	0.07473	no
Primary Forest	Primary Forest 2	7	4	1	4	0.03407	no
Primary Forest	Primary Forest 2	7	5	1	5	0.07709	yes
Primary Forest	Primary Forest 2	7	6	1	4	0.05927	yes
Primary Forest	Primary Forest 2	7	7	1	4	0.03414	no
Primary Forest	Primary Forest 2	7	8	1	6	0.09999	yes
Primary Forest	Primary Forest 2	7	9	1	3	0.03855	yes
Primary Forest	Primary Forest 2	7	10	1	5	0.06137	yes
Primary Forest	Primary Forest 3	8	1	1	3	0.06588	yes
Primary Forest	Primary Forest 3	8	2	1	4	0.05889	yes
Primary Forest	Primary Forest 3	8	3	0.833333333	5	0.09787	yes
Primary Forest	Primary Forest 3	8	4	0.9	4	0.05068	no
Primary Forest	Primary Forest 3	8	5	1	4	0.12125	yes
Primary Forest	Primary Forest 3	8	6	1	3	0.03982	no
Primary Forest	Primary Forest 3	8	7	1	4	0.03615	yes
Primary Forest	Primary Forest 3	8	8	1	3	0.05202	yes
Primary Forest	Primary Forest 3	8	9	1	4	0.04745	no
Primary Forest	Primary Forest 3	8	10	1	4	0.04706	yes
Primary Forest	Primary Forest 3	9	1	1	3	0.04813	yes
Primary Forest	Primary Forest 3	9	2	1	5	0.0704	yes
Primary Forest	Primary Forest 3	9	3	1	4	0.10087	yes
Primary Forest	Primary Forest 3	9	4	1	4	0.07119	yes
Primary Forest	Primary Forest 3	9	5	1	3	0.05401	yes
Primary Forest	Primary Forest 3	9	6	1	4	0.08431	yes
Primary Forest	Primary Forest 3	9	7	1	4	0.09359	no
Primary Forest	Primary Forest 3	9	8	1	3	0.051	no
Primary Forest	Primary Forest 3	9	9	1	4	0.04749	yes
Primary Forest	Primary Forest 3	9	10	1	2	0.04163	yes
Primary Forest	Primary Forest 3	10	1	1	2	0.04563	yes
Primary Forest	Primary Forest 3	10	2	1	5	0.09827	yes
Primary Forest	Primary Forest 3	10	3	1	4	0.05528	no
Primary Forest	Primary Forest 3	10	4	0.666666667	3	0.06718	yes
Primary Forest	Primary Forest 3	10	5	1	4	0.05323	yes
Primary Forest	Primary Forest 3	10	6	1	3	0.03968	yes
Primary Forest	Primary Forest 3	10	7	1	3	0.04544	yes
Primary Forest	Primary Forest 3	10	8	1	5	0.07575	yes
Primary Forest	Primary Forest 3	10	9	1	2	0.03148	yes
Primary Forest	Primary Forest 3	10	10	1	5	0.06226	yes
Aggregate	Aggregate 1	1	1	0.875	5	0.0765	yes
Aggregate	Aggregate 1	1	2	1	5	0.16099	no
Aggregate	Aggregate 1	1	3	0.909090909	3	0.11955	yes
Aggregate	Aggregate 1	1	4	0.857142857	2	0.03126	no
Aggregate	Aggregate 1	1	5	1	4	0.05918	no
Aggregate	Aggregate 1	1	6	0.688888889	4	0.06681	yes
Aggregate	Aggregate 1	1	7	1	3	0.0371	yes
Aggregate	Aggregate 1	1	8	1	3	0.05946	yes
Aggregate	Aggregate 1	1	9	1	4	0.06639	yes
Aggregate	Aggregate 1	1	10	1	9	0.28261	yes
Aggregate	Aggregate 1	2	1	1	3	0.07193	yes
Aggregate	Aggregate 1	2	2	1	10	0.06537	yes
Aggregate	Aggregate 1	2	3	1	2	0.05819	yes
Aggregate	Aggregate 1	2	4	1	4	0.13739	no
Aggregate	Aggregate 1	2	5	1	3	0.15019	no
Aggregate	Aggregate 1	2	6	1	3	0.04515	no
Aggregate	Aggregate 1	2	7	1	3	0.08887	yes
Aggregate	Aggregate 1	2	8	1	4	0.09162	yes
Aggregate	Aggregate 1	2	9	1	4	0.10208	no
Aggregate	Aggregate 1	2	10	1	3	0.04727	no
Aggregate	Aggregate 1	3	1	1	2	0.05853	yes
Aggregate	Aggregate 1	3	2	1	2	0.08747	no
Aggregate	Aggregate 1	3	3	1	3	0.11248	yes
Aggregate	Aggregate 1	3	4	1	3	0.15736	yes
Aggregate	Aggregate 1	3	5	1	3	0.10291	yes
Aggregate	Aggregate 1	3	6	1	2	0.03341	yes
Aggregate	Aggregate 1	3	7	1	4	0.14486	no
Aggregate	Aggregate 1	3	8	1	3	0.10946	no
Aggregate	Aggregate 1	3	9	1	3	0.28579	yes
Aggregate	Aggregate 1	3	10	1	3	0.07291	no
Aggregate	Aggregate 2	4	1	1	3	0.065295	yes
Aggregate	Aggregate 2	4	2	1	3	0.08309	no
Aggregate	Aggregate 2	4	3	1	3	0.0691	yes
Aggregate	Aggregate 2	4	4	1	3	0.12134	no
Aggregate	Aggregate 2	4	5	1	3	0.06033	no
Aggregate	Aggregate 2	4	6	1	3	0.12216	no
Aggregate	Aggregate 2	4	7	1	3	0.04615	yes
Aggregate	Aggregate 2	4	8	1	3	0.07074	no
Aggregate	Aggregate 2	4	9	1	3	0.04506	no
Aggregate	Aggregate 2	4	10	1	3	0.07542	yes
Aggregate	Aggregate 2	5	1	1	3	0.09161	no
Aggregate	Aggregate 2	5	2	1	3	0.05087	no
Aggregate	Aggregate 2	5	3	1	3	0.06728	no
Aggregate	Aggregate 2	5	4	1	4	0.11705	yes
Aggregate	Aggregate 2	5	5	1	3	0.05608	no
Aggregate	Aggregate 2	5	6	1	3	0.05605	no
Aggregate	Aggregate 2	5	7	1	5	0.11835	no
Aggregate	Aggregate 2	5	8	1	4	0.07082	yes
Aggregate	Aggregate 2	5	9	1	4	0.18333	yes
Aggregate	Aggregate 2	5	10	1	4	0.09806	no
Aggregate	Aggregate 2	6	1	1	4	0.1185	no
Aggregate	Aggregate 2	6	2	1	3	0.08011	no
Aggregate	Aggregate 2	6	3	1	5	0.10499	no
Aggregate	Aggregate 2	6	4	1	3	0.02698	yes
Aggregate	Aggregate 2	6	5	1	3	0.07025	yes
Aggregate	Aggregate 2	6	6	1	3	0.0568	no
Aggregate	Aggregate 2	6	7	1	3	0.07046	no
Aggregate	Aggregate 2	6	8	1	3	0.11262	yes
Aggregate	Aggregate 2	6	9	1	3	0.04555	no
Aggregate	Aggregate 2	6	10	1	3	0.10643	no
Aggregate	Aggregate 3	7	1	1	4	0.09587	yes
Aggregate	Aggregate 3	7	2	1	4	0.14389	no
Aggregate	Aggregate 3	7	3	1	3	0.12269	yes
Aggregate	Aggregate 3	7	4	1	4	0.0625	yes
Aggregate	Aggregate 3	7	5	1	4	0.14311	yes
Aggregate	Aggregate 3	7	6	1	3	0.13347	yes
Aggregate	Aggregate 3	7	7	1	3	0.04517	yes
Aggregate	Aggregate 3	7	8	1	3	0.08567	yes
Aggregate	Aggregate 3	7	9	1	4	0.17446	yes
Aggregate	Aggregate 3	7	10	1	5	0.29803	yes
Aggregate	Aggregate 3	8	1	1	3	0.1529	no
Aggregate	Aggregate 3	8	2	1	5	0.15272	yes
Aggregate	Aggregate 3	8	3	1	4	0.12987	yes
Aggregate	Aggregate 3	8	4	1	4	0.06529	yes
Aggregate	Aggregate 3	8	5	0.769230769	3	0.0811	yes
Aggregate	Aggregate 3	8	6	1	4	0.07278	no
Aggregate	Aggregate 3	8	7	1	4	0.11785	yes
Aggregate	Aggregate 3	8	8	1	6	0.1597	yes
Aggregate	Aggregate 3	8	9	1	4	0.19448	no
Aggregate	Aggregate 3	8	10	1	4	0.11876	yes
Aggregate	Aggregate 3	9	1	1	1	0.12834	yes
Aggregate	Aggregate 3	9	2	1	7	0.15224	yes
Aggregate	Aggregate 3	9	3	1	4	0.08409	yes
Aggregate	Aggregate 3	9	4	1	6	0.17442	yes
Aggregate	Aggregate 3	9	5	1	4	0.08213	yes
Aggregate	Aggregate 3	9	6	1	5	0.10773	yes
Aggregate	Aggregate 3	9	7	1	4	0.15351	yes
Aggregate	Aggregate 3	9	8	1	4	0.06987	yes
Aggregate	Aggregate 3	9	9	1	11	0.80792	yes
Aggregate	Aggregate 3	9	10	1	6	0.12077	yes
Dispersal Retention	Dispersal 1	1	1	1	5	0.20592	yes
Dispersal Retention	Dispersal 1	1	2	0.965517241	5	0.20657	yes
Dispersal Retention	Dispersal 1	1	3	1	10	0.25709	no
Dispersal Retention	Dispersal 1	1	4	0.730769231	4	0.25762	no
Dispersal Retention	Dispersal 1	1	5	1	5	0.51115	no
Dispersal Retention	Dispersal 1	1	6	1	4	0.2424	no
Dispersal Retention	Dispersal 1	1	7	1	4	0.1722	no
Dispersal Retention	Dispersal 1	1	8	1	6	0.76765	yes
Dispersal Retention	Dispersal 1	1	9	0.833333333	8	0.08133	yes
Dispersal Retention	Dispersal 1	1	10	1	4	0.14798	yes
Dispersal Retention	Dispersal 1	2	1	1	5	1.01915	yes
Dispersal Retention	Dispersal 1	2	2	1	4	0.46105	no
Dispersal Retention	Dispersal 1	2	3	1	4	0.2049	no
Dispersal Retention	Dispersal 1	2	4	1	4	0.367	yes
Dispersal Retention	Dispersal 1	2	5	1	3	0.52553	no
Dispersal Retention	Dispersal 1	2	6	0.942857143	2	0.19072	no
Dispersal Retention	Dispersal 1	2	7	0.894736842	3	0.11129	yes
Dispersal Retention	Dispersal 1	2	8	1	3	0.64166	no
Dispersal Retention	Dispersal 1	2	9	0.947368421	4	0.70283	no
Dispersal Retention	Dispersal 1	2	10	0.983333333	4	0.66543	yes
Dispersal Retention	Dispersal 1	3	1	1	3	0.26851	no
Dispersal Retention	Dispersal 1	3	2	1	4	0.65172	no
Dispersal Retention	Dispersal 1	3	3	1	4	0.10931	no
Dispersal Retention	Dispersal 1	3	4	0.971830986	5	1.45715	yes
Dispersal Retention	Dispersal 1	3	5	1	5	0.55991	no
Dispersal Retention	Dispersal 1	3	6	1	5	0.80709	no
Dispersal Retention	Dispersal 1	3	7	1	4	0.43923	no
Dispersal Retention	Dispersal 1	3	8	1	4	0.77711	yes
Dispersal Retention	Dispersal 1	3	9	1	6	0.95045	yes
Dispersal Retention	Dispersal 1	3	10	1	4	1.57885	no
Dispersal Retention	Dispersal 2	4	1	0.577777778	4	0.81333	yes
Dispersal Retention	Dispersal 2	4	2	0.927272727	5	1.30993	no
Dispersal Retention	Dispersal 2	4	3	0.944444444	4	0.68557	no
Dispersal Retention	Dispersal 2	4	4	0.64	3	0.07759	no
Dispersal Retention	Dispersal 2	4	5	1	4	0.22636	yes
Dispersal Retention	Dispersal 2	4	6	1	5	0.60754	no
Dispersal Retention	Dispersal 2	4	7	1	4	0.31505	no
Dispersal Retention	Dispersal 2	4	8	1	4	0.98283	no
Dispersal Retention	Dispersal 2	4	9	0.875	5	0.54936	no
Dispersal Retention	Dispersal 2	4	10	1	5	1.53715	no
Dispersal Retention	Dispersal 2	5	1	1	5	0.42426	yes
Dispersal Retention	Dispersal 2	5	2	1	6	0.83457	yes
Dispersal Retention	Dispersal 2	5	3	1	6	1.14963	no
Dispersal Retention	Dispersal 2	5	4	1	5	0.27869	no
Dispersal Retention	Dispersal 2	5	5	0.594594595	10	0.40051	no
Dispersal Retention	Dispersal 2	5	6	0.900900901	8	0.63453	yes
Dispersal Retention	Dispersal 2	5	7	0.384615385	7	0.67825	no
Dispersal Retention	Dispersal 2	5	8	0.391304348	6	0.35649	yes
Dispersal Retention	Dispersal 2	5	9	0.796610169	6	0.36642	no
Dispersal Retention	Dispersal 2	5	10	0.811764706	7	1.39881	yes
Dispersal Retention	Dispersal 2	6	1	0.944444444	4	0.19727	no
Dispersal Retention	Dispersal 2	6	2	1	3	0.13271	no
Dispersal Retention	Dispersal 2	6	3	1	3	0.13628	no
Dispersal Retention	Dispersal 2	6	4	1	4	0.49554	yes
Dispersal Retention	Dispersal 2	6	5	1	3	0.34427	yes
Dispersal Retention	Dispersal 2	6	6	0.942857143	4	0.29424	no
Dispersal Retention	Dispersal 2	6	7	1	5	0.78009	yes
Dispersal Retention	Dispersal 2	6	8	1	3	0.67708	yes
Dispersal Retention	Dispersal 2	6	9	1	4	0.522	yes
Dispersal Retention	Dispersal 2	6	10	0.944444444	4	0.39213	no
Dispersal Retention	Dispersal 3	7	1	1	4	0.42386	no
Dispersal Retention	Dispersal 3	7	2	1	3	0.1797	no
Dispersal Retention	Dispersal 3	7	3	1	4	0.029782	yes
Dispersal Retention	Dispersal 3	7	4	1	4	0.14527	no
Dispersal Retention	Dispersal 3	7	5	1	4	0.70397	yes
Dispersal Retention	Dispersal 3	7	6	1	4	0.51844	yes
Dispersal Retention	Dispersal 3	7	7	1	3	0.2105	no
Dispersal Retention	Dispersal 3	7	8	1	4	0.68217	yes
Dispersal Retention	Dispersal 3	7	9	1	5	0.80767	yes
Dispersal Retention	Dispersal 3	7	10	1	6	1.32284	no
Dispersal Retention	Dispersal 3	8	1	1	5	0.91435	no
Dispersal Retention	Dispersal 3	8	2	1	3	0.21661	yes
Dispersal Retention	Dispersal 3	8	3	1	4	0.71138	yes
Dispersal Retention	Dispersal 3	8	4	1	4	0.2066	yes
Dispersal Retention	Dispersal 3	8	5	1	4	0.26245	yes
Dispersal Retention	Dispersal 3	8	6	1	6	1.61904	no
Dispersal Retention	Dispersal 3	8	7	1	3	0.21721	yes
Dispersal Retention	Dispersal 3	8	8	1	5	1.97514	yes
Dispersal Retention	Dispersal 3	8	9	1	5	1.41643	yes
Dispersal Retention	Dispersal 3	8	10	1	3	0.12917	no
Dispersal Retention	Dispersal 3	9	1	1	4	0.37071	yes
Dispersal Retention	Dispersal 3	9	2	1	5	0.35512	yes
Dispersal Retention	Dispersal 3	9	3	1	6	0.18364	yes
Dispersal Retention	Dispersal 3	9	4	1	7	1.14529	yes
Dispersal Retention	Dispersal 3	9	5	1	4	0.42087	yes
Dispersal Retention	Dispersal 3	9	6	1	3	0.10671	no
Dispersal Retention	Dispersal 3	9	7	1	8	0.59843	yes
Dispersal Retention	Dispersal 3	9	8	1	4	0.22467	no
Dispersal Retention	Dispersal 3	9	9	1	4	0.17238	no
Dispersal Retention	Dispersal 3	9	10	1	3	0.82625	yes
