# Supplementary material for: Variable retention harvesting influences belowground plant-fungal interactions of Nothofagus pumilio seedlings in forests of southern Patagonia
Source: PeerJ. 2018 Jul 6;6:e5008. doi: 10.7717/peerj.5008 (PMC6037133; doi:10.7717/peerj.5008)
Supplement: Table S1 — Phylum B = Basidiomycota, A = Ascomycota. Guild EMF = ectomycorrhizal fungus, DSE = dark septate endophyte, ERM = ericoid mycorrhizal fungus, SAP = saprotrophic fungus. Reference and Identity (%) is the sequence similarity between the query sequence and the hit sequence from the GenBank database. Coverage is the percentage of the top match sequence that aligns with the query sequence. [file peerj-06-5008-s001.xlsx]

## Sheet: Table S1
					RDP Naive Bayesian
GenBank Accession	#OTU ID	OTU TOTAL	Top Blast Description	Top Blast Accession	% ID	Bit Score	Phylum	Probability	Subphylum	Probability	Class	Probability	Subclass	Probability	Order	Probability	Family	Probability	Genus	Probability	Species	Probability	Trophic Niche
MH019775	OTU1	63	Ruhlandiella sp. RH-2012 voucher FLAS:MES-556	JX414205.1	99.83	1058	Ascomycota	1	Pezizomycotina	1	Pezizomycetes	1	Pezizomycetidae	1	Pezizales	1	Pezizaceae	1	Peziza	0.47	Peziza depressa	0.21	likely ECM
MH019894	OTU4	51	Aleurina sp. voucher MES-1336	KY523093.1	100	1285	Ascomycota	0.89	Pezizomycotina	0.87	Pezizomycetes	0.51	Pezizomycetidae	0.51	Pezizales	0.51	Pyronemataceae	0.34	Geopora	0.11	Geopora foliacea	0.07	ECM
MH019774	OTU0	42	Aleurina echinata voucher DHP-CH21	KC905033.1	100	1054	Ascomycota	0.87	Pezizomycotina	0.72	Pezizomycetes	0.39	Pezizomycetidae	0.39	Pezizales	0.39	Pyronemataceae	0.2	Geopora	0.14	Geopora tenuis	0.14	likely ECM
MH019798	OTU12	29	Descolea antarctica voucher MES-2016	KY523098.1	99.859	1276	Basidiomycota	1	Agaricomycotina	1	Agaricomycetes	1	Agaricomycetidae	1	Agaricales	1	Agaricales_Incertae sedis	0.96	Timgrovea	0.96	Timgrovea ferruginea	0.96	ECM
MH019872	OTU2	27	Gymnohydnotrya sp. voucher MES-577	KY462684.1	99.53	1155	Ascomycota	0.97	Pezizomycotina	0.97	Pezizomycetes	0.69	Pezizomycetidae	0.69	Pezizales	0.69	Helvellaceae	0.31	Helvella	0.3	Helvella beatonii	0.3	likely ECM
MH019787	OTU11	21	Cortinarius xenosma voucher PDD:101822	KY462446.1	100	1092	Basidiomycota	1	Agaricomycotina	1	Agaricomycetes	1	Agaricomycetidae	1	Agaricales	1	Cortinariaceae	1	Cortinarius	0.96	Cortinarius cycneus	0.27	ECM
MH019916	OTU6	20	Rickenella minuta strain MES1892	KY559324.1	100	1223	Basidiomycota	1	Agaricomycotina	1	Agaricomycetes	1	Agaricomycetes_Incertae sedis	1	Agaricomycetes_Incertae sedis	1	Agaricomycetes_Incertae sedis	1	Rickenella	1	Rickenella fibula	1	SAP
MH019911	OTU55	14	Cortinarius sp. voucher CT-4287	KY462324.1	100	1088	Basidiomycota	1	Agaricomycotina	1	Agaricomycetes	1	Agaricomycetidae	1	Agaricales	1	Cortinariaceae	0.95	Cortinarius	0.93	Cortinarius amoenus	0.24	ECM
MH019820	OTU14	13	Descolea sp. ABM-2017b voucher MES-1586	KY523093.1	100	1285	Basidiomycota	1	Agaricomycotina	1	Agaricomycetes	1	Agaricomycetidae	1	Agaricales	1	Agaricales_Incertae sedis	0.91	Timgrovea	0.9	Timgrovea ferruginea	0.9	ECM
MH019883	OTU3	13	Tomentella lateritia isolate 403	KP783474.1	96	1065	Basidiomycota	1	Agaricomycotina	1	Agaricomycetes	1	Agaricomycetes_Incertae sedis	1	Thelephorales	1	Thelephoraceae	1	Tomentella	1	Tomentella botryoides	0.41	ECM
MH019874	OTU21	12	Inocybe sp. voucher MES-1971	KY462627.1	95	982	Basidiomycota	1	Agaricomycotina	1	Agaricomycetes	1	Agaricomycetidae	1	Agaricales	1	Inocybaceae	1	Inocybe	1	Inocybe fibrillosibrunnea	0.44	ECM
MH019888	OTU34	12	Cortinarius sp. PDD 88258	KJ635227.1	97	1122	Basidiomycota	1	Agaricomycotina	1	Agaricomycetes	1	Agaricomycetidae	1	Agaricales	1	Cortinariaceae	1	Cortinarius	0.97	Cortinarius cycneus	0.26	ECM
MH019809	OTU13	10	Inocybe sp. AU57 strain NLB262	KJ778865.1	90	926	Basidiomycota	1	Agaricomycotina	1	Agaricomycetes	1	Agaricomycetidae	1	Agaricales	1	Inocybaceae	0.99	Inocybe	0.99	Inocybe serotina	0.28	ECM
MH019927	OTU7	10	Tomentella sp. voucher MES-2144	KY462669.1	99	1034	Basidiomycota	1	Agaricomycotina	1	Agaricomycetes	1	Agaricomycetes_Incertae sedis	0.99	Thelephorales	0.99	Thelephoraceae	0.99	Tomentella	0.99	Tomentella fuscocinerea	0.73	ECM
MH019873	OTU20	9	Inocybe sp. voucher MES-1717	KY462533.1	96	1000	Basidiomycota	1	Agaricomycotina	1	Agaricomycetes	1	Agaricomycetidae	1	Agaricales	1	Inocybaceae	0.99	Inocybe	0.99	Inocybe fibrillosibrunnea	0.33	ECM
MH019936	OTU78	9	Ascomycota sp. BB-2010 voucher BB62_303_Oh_Fa_011106	HM190131.1	95	917	Ascomycota	1	Pezizomycotina	1	Leotiomycetes	0.99	Leotiomycetidae	0.93	Helotiales	0.93	Helotiaceae	0.5	Leptodontidium	0.42	Leptodontidium elatius	0.42	DSE
MH019776	OTU10	8	Dothideomycetes sp. 3 KO-2013	AB846998.1	94.97	780	Ascomycota	1	Pezizomycotina	1	Dothideomycetes	1	Dothideomycetidae	0.42	Capnodiales	0.42	Mycosphaerellaceae	0.42	Petrakia	0.42	Xenostigmina zilleri	0.25	uncertain
MH019853	OTU17	8	Cortinarius elaiops voucher PDD:107732	KT875181.1	97	1113	Basidiomycota	1	Agaricomycotina	1	Agaricomycetes	1	Agaricomycetidae	1	Agaricales	1	Cortinariaceae	1	Cortinarius	0.9	Cortinarius alienatus	0.56	ECM
MH019879	OTU26	8	Sistotrema citriforme	KF218962.1	83	684	Basidiomycota	1	Agaricomycotina	0.91	Agaricomycetes	0.9	Agaricomycetes_Incertae sedis	0.83	Cantharellales	0.82	Clavulinaceae	0.79	Clavulina	0.79	Clavulina sprucei	0.59	uncertain
MH019938	OTU8	8	Inocybe sp. voucher MES-1233	KY462440.1	99	1119	Basidiomycota	1	Agaricomycotina	1	Agaricomycetes	1	Agaricomycetidae	1	Agaricales	1	Inocybaceae	0.97	Inocybe	0.97	Inocybe godeyi	0.46	ECM
MH019864	OTU18	7	Russula tawai voucher OTA:61981	JX178491.1	96	1155	Basidiomycota	1	Agaricomycotina	1	Agaricomycetes	1	Agaricomycetidae	1	Russulales	1	Russulaceae	1	Russula	1	Russula tawai	0.81	ECM
MH019891	OTU37	7	Dermocybe purpurata voucher PDD:103883	KF727360.1	96	1095	Basidiomycota	1	Agaricomycotina	1	Agaricomycetes	1	Agaricomycetidae	1	Agaricales	1	Cortinariaceae	0.97	Cortinarius	0.73	Cortinarius alienatus	0.33	ECM
MH019842	OTU16	6	Geastrum indicum voucher F:1309538	JN845098.1	98.662	1036	Basidiomycota	1	Agaricomycotina	0.99	Agaricomycetes	0.99	Phallomycetidae	0.86	Gomphales	0.46	Gomphaceae	0.46	Ramaria	0.37	Ramaria conjunctipes	0.26	uncertain
MH019871	OTU19	6	Cenococcum geophilum isolate 12d	KX449206.1	98.866	928	Ascomycota	1	Pezizomycotina	1	Dothideomycetes	1	Dothideomycetes_Incertae sedis	1	Dothideomycetes_Incertae sedis	1	Gloniaceae	1	Cenococcum	1	uncultured Cenococcum	0.5	ECM
MH019877	OTU24	6	Tulasnella sp. voucher MES-2153	KY462672.1	98.86	1076	Basidiomycota	0.87	Agaricomycotina	0.7	Agaricomycetes	0.67	Agaricomycetidae	0.54	Agaricales	0.49	Hygrophoraceae	0.21	Camarophyllopsis	0.21	Camarophyllopsis hymenocephala	0.21	likely ECM
MH019881	OTU28	6	Porpoloma portentosum strain Singer M149 voucher MICH:00011834	KJ417300.1	100	1164	Basidiomycota	1	Agaricomycotina	1	Agaricomycetes	1	Agaricomycetidae	1	Agaricales	1	Tricholomataceae	0.83	Tricholoma	0.67	Tricholoma scalpturatum	0.31	ECM
MH019895	OTU40	6	Cladosporium herbarum isolate A8	KX611004.1	100	985	Ascomycota	1	Pezizomycotina	1	Dothideomycetes	1	Dothideomycetidae	1	Capnodiales	1	Mycosphaerellaceae	1	Davidiella	1	Davidiella macrospora	0.56	SAP
MH019905	OTU5	6	Cortinarius sp. voucher MES-1601	KY462491.1	100	1092	Basidiomycota	1	Agaricomycotina	1	Agaricomycetes	1	Agaricomycetidae	1	Agaricales	1	Cortinariaceae	1	Cortinarius	0.94	Cortinarius cycneus	0.27	ECM
MH019912	OTU56	6	Bovista limosa voucher MJ060816	EU915075.1	99.693	1168	Basidiomycota	1	Agaricomycotina	1	Agaricomycetes	1	Agaricomycetidae	1	Agaricales	1	Lycoperdaceae	1	Bovista	1	Bovista limosa	1	SAP
MH019949	OTU9	6	Inocybe subretipes strain M380	KY559312.1	91.888	987	Basidiomycota	1	Agaricomycotina	1	Agaricomycetes	1	Agaricomycetidae	1	Agaricales	1	Inocybaceae	1	Inocybe	1	Inocybe fibrillosibrunnea	0.36	ECM
MH019900	OTU45	5	Cortinarius xenosma voucher PDD:101822	KJ635207.1	95.627	1083	Basidiomycota	1	Agaricomycotina	1	Agaricomycetes	1	Agaricomycetidae	1	Agaricales	1	Cortinariaceae	1	Cortinarius	1	Cortinarius cycneus	0.19	ECM
MH019909	OTU53	5	Olpidium brassicae isolate MX-O6	EU981899.1	90.303	224	Basidiomycota	0.63	Agaricomycotina	0.5	Agaricomycetes	0.47	Agaricomycetidae	0.36	Agaricales	0.34	Cortinariaceae	0.18	Cortinarius	0.15	Cortinarius haasii	0.03	uncertain
MH019795	OTU117	4	Salvia reuteriana voucher re.1	KP294360.1	99.424	1234	Basidiomycota	1	Ustilaginomycotina	1	Ustilaginomycotina_Incertae sedis	1	Ustilaginomycotina_Incertae sedis	1	Malasseziales	1	Malasseziales_Incertae sedis	1	Malassezia	1	Malassezia restricta	1	YEAST
MH019796	OTU118	4	Cortinarius sp. voucher MES-2031	KY462645.1	99.688	1142	Basidiomycota	1	Agaricomycotina	1	Agaricomycetes	1	Agaricomycetidae	1	Agaricales	1	Cortinariaceae	1	Cortinarius	0.98	Cortinarius luhmannii	0.39	ECM
MH019800	OTU121	4	Ascomycota sp. BB-2010 voucher BB62_303_Oh_Fa_011106	HM190131.1	95.326	948	Ascomycota	1	Pezizomycotina	1	Leotiomycetes	0.93	Leotiomycetidae	0.93	Helotiales	0.93	Helotiaceae	0.64	Leptodontidium	0.55	Leptodontidium elatius	0.55	DSE
MH019807	OTU128	4	Cortinarius badiovinaceus IB 19500061	JX648595.1	96.496	1113	Basidiomycota	1	Agaricomycotina	1	Agaricomycetes	1	Agaricomycetidae	1	Agaricales	1	Cortinariaceae	1	Cortinarius	1	Cortinarius ochrophyllus	0.48	ECM
MH019875	OTU22	4	Tarzetta sp. voucher MES-2162	KY462675.1	99.002	877	Ascomycota	0.92	Pezizomycotina	0.89	Pezizomycetes	0.33	Pezizomycetidae	0.33	Pezizales	0.33	Pyronemataceae	0.21	Trichophaea	0.07	Trichophaea hybrida	0.07	ECM
MH019887	OTU33	4	Inocybe sp. voucher MES-2099	KY462658.1	95.437	785	Basidiomycota	1	Agaricomycotina	1	Agaricomycetes	1	Agaricomycetidae	1	Agaricales	1	Inocybaceae	1	Inocybe	1	Inocybe godeyi	0.4	ECM
MH019904	OTU49	4	Hyaloscyphaceae sp. KO-groupC	AB986375.1	93.874	769	Ascomycota	1	Pezizomycotina	1	Leotiomycetes	0.97	Leotiomycetidae	0.95	Helotiales	0.95	Helotiaceae	0.78	Leptodontidium	0.7	Leptodontidium elatius	0.7	DSE
MH019908	OTU52	4	Russula sp. voucher CT-4225	KY462293.1	96.828	973	Basidiomycota	1	Agaricomycotina	1	Agaricomycetes	1	Agaricomycetidae	1	Russulales	1	Russulaceae	1	Russula	0.75	Russula pallidospora	0.37	ECM
MH019917	OTU60	4	Trametes versicolor isolate CF99	KM979753.1	99.658	1047	Basidiomycota	1	Agaricomycotina	1	Agaricomycetes	1	Agaricomycetes_Incertae sedis	1	Polyporales	1	Polyporaceae	1	Trametes	1	Trametes versicolor	0.93	wood decay
MH019789	OTU111	3	Bjerkandera adusta strain FP-101236-Sp	KP134982.1	100	1052	Basidiomycota	1	Agaricomycotina	1	Agaricomycetes	1	Agaricomycetes_Incertae sedis	1	Polyporales	1	Hapalopilaceae	1	Bjerkandera	1	Bjerkandera adusta	1	wood decay
MH019803	OTU124	3	Schizophyllum commune	LC228683.1	95.793	845	Basidiomycota	1	Agaricomycotina	1	Agaricomycetes	1	Agaricomycetidae	1	Agaricales	1	Schizophyllaceae	1	Schizophyllum	1	Schizophyllum commune	1	SAP
MH019825	OTU144	3	Ceratobasidiaceae sp. M152	HM141013.1	94.855	953	Basidiomycota	1	Agaricomycotina	1	Agaricomycetes	1	Agaricomycetes_Incertae sedis	0.97	Cantharellales	0.97	Ceratobasidiaceae	0.97	Ceratobasidium	0.95	Ceratobasidium sp 0109CI64L1	0.81	SAP
MH019831	OTU15	3	Cortinarius vaginatus voucher TUB 020418	KJ421095.1	100	1245	Basidiomycota	1	Agaricomycotina	1	Agaricomycetes	1	Agaricomycetidae	1	Agaricales	1	Cortinariaceae	1	Cortinarius	1	Cortinarius viscoviridis	0.23	ECM
MH019833	OTU151	3	Clavulina sp. 2 SE-2015	KT275655.1	85.215	643	Basidiomycota	1	Agaricomycotina	1	Agaricomycetes	1	Agaricomycetes_Incertae sedis	1	Cantharellales	1	Clavulinaceae	1	Clavulina	1	Clavulina cirrhata	0.32	ECM
MH019876	OTU23	3	Sebacinaceae sp. LM1253	KM576587.1	95.637	917	Basidiomycota	0.96	Agaricomycotina	0.93	Agaricomycetes	0.9	Agaricomycetes_Incertae sedis	0.7	Sebacinales	0.67	Sebacinales Group A	0.67	Sebacina	0.67	Sebacina incrustans	0.67	ECM
MH019878	OTU25	3	Candida sake culture-collection CBS:6716	KY102384.1	99.754	726	Ascomycota	1	Saccharomycotina	1	Saccharomycetes	1	Saccharomycetidae	1	Saccharomycetales	1	Saccharomycetales_Incertae sedis	1	Candida	1	Candida sake	1	YEAST
MH019884	OTU30	3	Clavulina sp. isolate 162	KY611396.1	85.735	787	Basidiomycota	1	Agaricomycotina	1	Agaricomycetes	1	Agaricomycetes_Incertae sedis	1	Cantharellales	1	Clavulinaceae	1	Clavulina	1	Clavulina sprucei	0.58	ECM
MH019886	OTU32	3	Inocybe cf. bridgesiana CONC-F0252 voucher TENN:067758	KP171111.1	87.222	856	Basidiomycota	1	Agaricomycotina	1	Agaricomycetes	1	Agaricomycetidae	1	Agaricales	1	Inocybaceae	1	Inocybe	1	Inocybe fibrillosibrunnea	0.27	ECM
MH019889	OTU35	3	Inocybe sp. voucher MES-1971	KY462627.1	95.017	926	Basidiomycota	1	Agaricomycotina	1	Agaricomycetes	1	Agaricomycetidae	1	Agaricales	1	Inocybaceae	1	Inocybe	1	Inocybe fibrillosibrunnea	0.69	ECM
MH019890	OTU36	3	Cortinarius sp. voucher MES-1994	KY462634.1	99.169	1061	Basidiomycota	1	Agaricomycotina	1	Agaricomycetes	1	Agaricomycetidae	1	Agaricales	1	Cortinariaceae	1	Cortinarius	0.91	Cortinarius cycneus	0.2	ECM
MH019892	OTU38	3	Inocybe sp. voucher MES-1971	KY462627.1	99.165	848	Basidiomycota	1	Agaricomycotina	1	Agaricomycetes	1	Agaricomycetidae	1	Agaricales	1	Inocybaceae	1	Inocybe	1	Inocybe leptocystis	0.56	ECM
MH019893	OTU39	3	Penicillium sp. AP-2015	KT898129.1	99.635	973	Ascomycota	1	Pezizomycotina	1	Eurotiomycetes	1	Eurotiomycetidae	1	Eurotiales	1	Trichocomaceae	1	Penicillium	1	Penicillium jamesonlandense	0.67	SAP
MH019907	OTU51	3	Aleurina sp. voucher MES-1711	KY462532.1	96.761	816	Ascomycota	0.8	Pezizomycotina	0.76	Pezizomycetes	0.43	Pezizomycetidae	0.43	Pezizales	0.43	Morchellaceae	0.12	Morchella	0.12	Morchella sp Mes_26	0.1	uncertain
MH019940	OTU81	3	Filobasidium chernovii culture-collection CBS:8679	KY103413.1	95.4	648	Basidiomycota	1	Agaricomycotina	1	Tremellomycetes	1	Tremellomycetidae	1	Tremellales	1	Tremellaceae	1	Cryptococcus	1	Cryptococcus chernovii	0.99	SAP
MH019958	OTU98	3	Malassezia restricta CBS 7877	NR_103585.1	96.636	1081	Basidiomycota	1	Ustilaginomycotina	1	Ustilaginomycotina_Incertae sedis	1	Ustilaginomycotina_Incertae sedis	1	Malasseziales	1	Malasseziales_Incertae sedis	1	Malassezia	1	Malassezia restricta	1	YEAST
MH019772	OTU1145401	2	Cerrena unicolor isolate F24	GU067741.1	100	1077	Basidiomycota	1	Agaricomycotina	1	Agaricomycetes	1	Agaricomycetes_Incertae sedis	1	Polyporales	1	Polyporaceae	1	Cerrena	1	Cerrena unicolor	1	wood decay
MH019773	OTU2440443	2	Cortinarius sp. voucher MES-1994	KY462634.1	99.834	1083	Basidiomycota	1	Agaricomycotina	1	Agaricomycetes	1	Agaricomycetidae	1	Agaricales	1	Cortinariaceae	1	Cortinarius	0.94	Cortinarius amoenus	0.16	ECM
MH019782	OTU105	2	Tomentella sp. 16 SE-2015	KT275616.1	93.266	883	Basidiomycota	1	Agaricomycotina	1	Agaricomycetes	1	Agaricomycetes_Incertae sedis	0.95	Thelephorales	0.95	Thelephoraceae	0.95	Tomentella	0.83	Tomentella fuscocinerea	0.28	ECM
MH019799	OTU120	2	Underwoodia cf. singeri MES161	JQ925656.1	99.853	1227	Ascomycota	0.94	Pezizomycotina	0.92	Pezizomycetes	0.57	Pezizomycetidae	0.57	Pezizales	0.57	Morchellaceae	0.37	Morchella	0.35	Morchella sp Mes_22	0.18	ECM
MH019808	OTU129	2	Geomyces sp. LKF08-027	KM816679.1	100	1014	Ascomycota	1	Pezizomycotina	1	Dothideomycetes	1	Dothideomycetes_Incertae sedis	1	Dothideomycetes_Incertae sedis	1	Pseudeurotiaceae	1	Pseudogymnoascus	1	Geomyces pannorum	0.47	SAP
MH019812	OTU132	2	Epulorhiza sp. CMU-DP 502	HQ633052.1	74.898	282	Basidiomycota	0.8	Ustilaginomycotina	0.2	Ustilaginomycetes	0.19	Ustilaginomycetidae	0.18	Ustilaginales	0.18	Melanotaeniaceae	0.16	Melanotaenium	0.16	Melanotaenium euphorbiae	0.16	uncertain
MH019813	OTU133	2	Ascochyta sp. strain TN5-22	MF136540.1	98.02	690	Ascomycota	1	Pezizomycotina	1	Dothideomycetes	1	Pleosporomycetidae	1	Pleosporales	1	Pleosporales_Incertae sedis	0.72	Phoma	0.72	Epicoccum nigrum	0.41	pathogen
MH019816	OTU136	2	Inocybe redolens PERTH E7034	NR_120038.1	89.458	874	Basidiomycota	1	Agaricomycotina	1	Agaricomycetes	1	Agaricomycetidae	1	Agaricales	1	Inocybaceae	1	Inocybe	1	Inocybe leptophylla	0.59	ECM
MH019819	OTU139	2	Inocybe sp. voucher MES-2099	KY462658.1	96.457	812	Basidiomycota	1	Agaricomycotina	1	Agaricomycetes	1	Agaricomycetidae	1	Agaricales	1	Inocybaceae	1	Inocybe	1	Inocybe godeyi	0.23	ECM
MH019822	OTU141	2	Wilcoxina rehmii isolate PS10	KT182912.1	98.932	980	Ascomycota	1	Pezizomycotina	1	Pezizomycetes	1	Pezizomycetidae	1	Pezizales	1	Pyronemataceae	1	Wilcoxina	1	Wilcoxina rehmii	1	ECM
MH019829	OTU148	2	cf. Sistotrema sp. P37	FR838002.1	80.126	531	Basidiomycota	1	Agaricomycotina	1	Agaricomycetes	0.99	Agaricomycetes_Incertae sedis	0.95	Polyporales	0.89	Sistotremataceae	0.88	Sistotrema	0.88	Sistotrema alboluteum	0.88	uncertain
MH019850	OTU167	2	Filobasidium chernovii culture-collection CBS:8679	KY103413.1	98.517	1043	Basidiomycota	1	Agaricomycotina	1	Tremellomycetes	1	Tremellomycetidae	1	Tremellales	1	Tremellaceae	1	Cryptococcus	1	Cryptococcus chernovii	1	SAP
MH019880	OTU27	2	Thelephoraceae sp. MH01 MHR291689	KF679822.1	93.844	1009	Basidiomycota	1	Agaricomycotina	1	Agaricomycetes	1	Agaricomycetes_Incertae sedis	0.94	Thelephorales	0.94	Thelephoraceae	0.94	Tomentella	0.84	Tomentella ferruginea	0.3	ECM
MH019882	OTU29	2	Inocybe cf. lanuginosa OSC 1064099	EU525965.1	90.427	902	Basidiomycota	1	Agaricomycotina	1	Agaricomycetes	1	Agaricomycetidae	1	Agaricales	1	Inocybaceae	1	Inocybe	1	Inocybe leptophylla	0.9	ECM
MH019885	OTU31	2	Inocybe sp. voucher CT-4231	KY462297.1	99.843	1146	Basidiomycota	1	Agaricomycotina	1	Agaricomycetes	1	Agaricomycetidae	1	Agaricales	1	Inocybaceae	1	Inocybe	1	Inocybe fibrillosibrunnea	0.37	ECM
MH019901	OTU46	2	Articulospora tetracladia strain CCM F-44294	EU998916.1	95.455	870	Ascomycota	1	Pezizomycotina	1	Leotiomycetes	0.77	Leotiomycetidae	0.77	Helotiales	0.77	Helotiaceae	0.72	Hymenoscyphus	0.46	Articulospora tetracladia	0.46	DSE
MH019902	OTU47	2	[Cryptococcus] subarcticus culture-collection CBS:8936	KY102948.1	100	931	Basidiomycota	1	Agaricomycotina	1	Tremellomycetes	1	Tremellomycetidae	1	Tremellales	1	Tremellaceae	1	Cryptococcus	1	Cryptococcus victoriae	1	SAP
MH019913	OTU57	2	Sistotrema pistilliferum	KF218964.1	82.387	636	Basidiomycota	1	Agaricomycotina	1	Agaricomycetes	1	Agaricomycetes_Incertae sedis	1	Cantharellales	1	Clavulinaceae	1	Clavulina	1	Clavulina sprucei	0.58	ECM
MH019915	OTU59	2	Malassezia restricta strain U94	KX192383.1	97.044	1014	Basidiomycota	1	Ustilaginomycotina	1	Ustilaginomycotina_Incertae sedis	1	Ustilaginomycotina_Incertae sedis	1	Malasseziales	1	Malasseziales_Incertae sedis	1	Malassezia	1	Malassezia restricta	1	YEAST
MH019918	OTU61	2	Neonectria candida strain IHBF 2276	MF326628.1	99.402	892	Ascomycota	1	Pezizomycotina	1	Sordariomycetes	1	Hypocreomycetidae	1	Hypocreales	1	Nectriaceae	1	Neonectria	1	Cylindrocarpon didymum	0.99	pathogen or SAP
MH019926	OTU69	2	Meliniomyces bicolor strain ARSL 180907.22	HQ157926.1	99.805	921	Ascomycota	1	Pezizomycotina	1	Leotiomycetes	1	Leotiomycetidae	1	Helotiales	1	Helotiaceae	1	Pezoloma	1	Meliniomyces bicolor	0.88	ERM
MH019928	OTU70	2	Cryptococcus diffluens isolate POL.8.11.III.1	KC152904.1	99.838	1108	Basidiomycota	1	Agaricomycotina	1	Tremellomycetes	1	Tremellomycetidae	1	Tremellales	1	Tremellaceae	1	Cryptococcus	1	Cryptococcus albidosimilis	0.97	SAP
MH019934	OTU76	2	Helotiales sp. B54J3	EF093147.1	91.137	818	Ascomycota	0.9	Pezizomycotina	0.88	Leotiomycetes	0.5	Leotiomycetidae	0.5	Helotiales	0.35	Helotiaceae	0.22	Dimorphospora	0.11	Dimorphospora foliicola	0.11	uncertain
MH019942	OTU83	2	Cortinarius sp. DAO-2016a voucher PDD:92445	KT334131.1	96.372	1099	Basidiomycota	1	Agaricomycotina	1	Agaricomycetes	1	Agaricomycetidae	1	Agaricales	1	Cortinariaceae	1	Cortinarius	1	Cortinarius cycneus	0.59	ECM
MH019943	OTU84	2	Cortinarius sp. PDD 88258	KJ635227.1	92.52	888	Basidiomycota	1	Agaricomycotina	1	Agaricomycetes	1	Agaricomycetidae	1	Agaricales	1	Cortinariaceae	1	Cortinarius	0.98	Cortinarius cycneus	0.36	ECM
MH019950	OTU90	2	Cortinarius bellus voucher PDD:103880	KF727383.1	95.988	1032	Basidiomycota	1	Agaricomycotina	1	Agaricomycetes	1	Agaricomycetidae	1	Agaricales	1	Cortinariaceae	1	Cortinarius	1	Cortinarius cycneus	0.36	ECM
MH019953	OTU93	2	Austropaxillus boletinoides strain TFB8529	KY559344.1	100	1041	Basidiomycota	1	Agaricomycotina	1	Agaricomycetes	1	Agaricomycetidae	1	Boletales	1	Serpulaceae	1	Austropaxillus	1	Austropaxillus macnabbii	1	ECM
MH019955	OTU95	2	Rhodotorula mucilaginosa strain IIFCSW-B2	KY218730.1	100	1049	Basidiomycota	1	Pucciniomycotina	1	Microbotryomycetes	1	Microbotryomycetes_Incertae sedis	1	Sporidiobolales	1	Sporidiobolales_Incertae sedis	1	Rhodotorula	1	Rhodotorula mucilaginosa	1	YEAST
MH019956	OTU96	2	Cortinarius sp. PDD 107733	KT875182.1	94.872	1020	Basidiomycota	1	Agaricomycotina	1	Agaricomycetes	1	Agaricomycetidae	1	Agaricales	1	Cortinariaceae	1	Cortinarius	0.89	Cortinarius amoenus	0.53	ECM
MH019777	OTU100	1	Daedaleopsis confragosa isolate X-78	KC176348.1	100	1160	Basidiomycota	1	Agaricomycotina	1	Agaricomycetes	1	Agaricomycetes_Incertae sedis	1	Polyporales	1	Polyporaceae	1	Lenzites	1	Daedaleopsis confragosa	1	wood decay
MH019778	OTU101	1	Genea cephalonicae isolate VK4140	KJ938852.1	84.565	504	Ascomycota	1	Pezizomycotina	0.99	Pezizomycetes	0.98	Pezizomycetidae	0.98	Pezizales	0.98	Pyronemataceae	0.98	Genea	0.98	Genea hispidula	0.65	ECM
MH019779	OTU102	1	Bovista limosa voucher MJ060816	EU915075.1	92.265	776	Basidiomycota	1	Agaricomycotina	1	Agaricomycetes	1	Agaricomycetidae	1	Agaricales	1	Lycoperdaceae	1	Bovista	1	Bovista limosa	1	SAP
MH019780	OTU103	1	Thelephora terrestris voucher JMP0086	EU819444.1	89.812	838	Basidiomycota	1	Agaricomycotina	1	Agaricomycetes	1	Agaricomycetes_Incertae sedis	0.97	Thelephorales	0.97	Thelephoraceae	0.97	Tomentella	0.51	Tomentella lateritia	0.14	ECM
MH019781	OTU104	1	Cortinarius sp. voucher MES-1881	KY462605.1	95.118	933	Basidiomycota	1	Agaricomycotina	1	Agaricomycetes	1	Agaricomycetidae	1	Agaricales	1	Cortinariaceae	0.99	Cortinarius	0.98	Cortinarius cycneus	0.31	ECM
MH019783	OTU106	1	Cortinarius sp. voucher CT-4287	KY462324.1	92.894	839	Basidiomycota	1	Agaricomycotina	1	Agaricomycetes	1	Agaricomycetidae	1	Agaricales	1	Cortinariaceae	0.89	Cortinarius	0.88	Cortinarius amoenus	0.14	ECM
MH019784	OTU107	1	Ascomycota sp. 4 RB-2011	JQ272346.1	79.749	462	Ascomycota	0.81	Pezizomycotina	0.79	Eurotiomycetes	0.55	Chaetothyriomycetidae	0.51	Chaetothyriales	0.47	Herpotrichiellaceae	0.43	Cladophialophora	0.26	Cladophialophora sp CBS 35083	0.16	uncertain
MH019785	OTU108	1	Ramariopsis cf. subtilis isolate HA11	KY706174.1	83.771	666	Basidiomycota	0.96	Agaricomycotina	0.96	Agaricomycetes	0.96	Agaricomycetidae	0.89	Agaricales	0.83	Clavariaceae	0.46	Clavulinopsis	0.46	Clavulinopsis helvola	0.2	ECM
MH019786	OTU109	1	Vanrija longa culture-collection CBS:5920	KY102794.1	98.904	796	Basidiomycota	1	Agaricomycotina	1	Tremellomycetes	1	Tremellomycetes_Incertae sedis	1	Trichosporonales	1	Trichosporonaceae	1	Asterotremella	1	Asterotremella pseudolonga	1	mycoparasite
MH019788	OTU110	1	Hyphodontia pallidula voucher UC2022899	KP814456.1	85.455	728	Basidiomycota	1	Agaricomycotina	1	Agaricomycetes	1	Agaricomycetes_Incertae sedis	0.86	Hymenochaetales	0.76	Schizoporaceae	0.7	Hyphodontia	0.7	Hyphodontia alutaria	0.67	SAP
MH019790	OTU112	1	Cerrena unicolor strain xsd08079	FJ478121.1	100	1166	Basidiomycota	1	Agaricomycotina	1	Agaricomycetes	1	Agaricomycetes_Incertae sedis	1	Polyporales	1	Polyporaceae	1	Cerrena	1	Cerrena unicolor	1	wood decay
MH019791	OTU113	1	Fungal sp. R3	AY699666.1	97.538	890	Ascomycota	1	Pezizomycotina	1	Leotiomycetes	1	Leotiomycetidae	1	Helotiales	1	Helotiaceae	0.65	Leptodontidium	0.64	Leptodontidium elatius	0.64	DSE
MH019792	OTU114	1	Malassezia restricta strain ISOSEB42I	KP825470.1	89.433	839	Basidiomycota	1	Ustilaginomycotina	1	Ustilaginomycotina_Incertae sedis	1	Ustilaginomycotina_Incertae sedis	1	Malasseziales	1	Malasseziales_Incertae sedis	1	Malassezia	1	Malassezia restricta	1	YEAST
MH019793	OTU115	1	Aleurina sp. voucher MES-1336	KY462463.1	94.595	747	Ascomycota	0.76	Pezizomycotina	0.74	Eurotiomycetes	0.21	Chaetothyriomycetidae	0.13	Pyrenulales	0.12	Massariaceae	0.12	Massaria	0.12	Massaria platanoidea	0.04	uncertain
MH019794	OTU116	1	Inocybe cf. bridgesiana CONC-F0252	KP171111.1	98.156	1205	Basidiomycota	1	Agaricomycotina	1	Agaricomycetes	1	Agaricomycetidae	1	Agaricales	1	Inocybaceae	1	Inocybe	1	Inocybe fibrillosibrunnea	0.65	ECM
MH019797	OTU119	1	Penicillium brevicompactum isolate RP288_15	KX067822.1	99.812	955	Ascomycota	1	Pezizomycotina	1	Eurotiomycetes	1	Eurotiomycetidae	1	Eurotiales	1	Trichocomaceae	1	Penicillium	1	Penicillium brevicompactum	0.99	SAP
MH019801	OTU122	1	Genea cephalonicae isolate VK4140	KU933927.1	84.59	639	Ascomycota	1	Pezizomycotina	0.99	Pezizomycetes	0.97	Pezizomycetidae	0.97	Pezizales	0.97	Pyronemataceae	0.96	Genea	0.95	Genea hispidula	0.59	ECM
MH019802	OTU123	1	Rhodotorula kratochvilovae culture-collection CBS:5992	KY104789.1	99.301	1003	Basidiomycota	1	Pucciniomycotina	1	Microbotryomycetes	1	Microbotryomycetes_Incertae sedis	1	Sporidiobolales	1	Sporidiobolales_Incertae sedis	1	Rhodosporidium	1	Rhodosporidium kratochvilovae	0.71	YEAST
MH019804	OTU125	1	Cladosporium rectoides isolate KUC5009	JN033461.1	97.718	820	Ascomycota	1	Pezizomycotina	1	Dothideomycetes	1	Dothideomycetidae	1	Capnodiales	1	Mycosphaerellaceae	1	Davidiella	1	Cladosporium pseudocladosporioides	0.32	DSE
MH019805	OTU126	1	Hyaloscyphaceae sp. KO-groupC 2014	HM190131.1	92.95	796	Ascomycota	0.92	Pezizomycotina	0.92	Leotiomycetes	0.89	Leotiomycetidae	0.87	Helotiales	0.87	Hyaloscyphaceae	0.35	Pseudaegerita	0.35	Pseudaegerita viridis	0.35	uncertain
MH019806	OTU127	1	Porpoloma terreum strain REH5830 voucher NYBG:REH5830	KJ417305.1	96.517	975	Basidiomycota	1	Agaricomycotina	0.99	Agaricomycetes	0.99	Agaricomycetidae	0.99	Agaricales	0.99	Tricholomataceae	0.42	Tricholoma	0.32	Tricholoma orirubens	0.09	ECM
MH019810	OTU130	1	Phlebiopsis sp. 11B-16	KJ654602.1	100	1121	Basidiomycota	1	Agaricomycotina	1	Agaricomycetes	1	Agaricomycetes_Incertae sedis	1	Polyporales	1	Phanerochaetaceae	1	Phlebiopsis	1	Phlebiopsis gigantea	1	wood decay
MH019811	OTU131	1	Ilyonectria sp. LL-2013c culture-collection CBS:132811	JX231157.1	98.294	810	Ascomycota	1	Pezizomycotina	1	Sordariomycetes	1	Hypocreomycetidae	1	Hypocreales	1	Nectriaceae	1	Neonectria	0.97	Neonectria radicicola	0.61	pathogen
MH019814	OTU134	1	Cortinarius sp. voucher MES-1746	KY462542.1	93.636	668	Basidiomycota	1	Agaricomycotina	1	Agaricomycetes	1	Agaricomycetidae	1	Agaricales	1	Cortinariaceae	1	Cortinarius	0.99	Cortinarius viscoviridis	0.41	ECM
MH019815	OTU135	1	Rhizophlyctis rosea isolate PL131	EU379236.1	90.857	239	Chytridiomycota	0.2	Chytridiomycota_Incertae sedis	0.2	Chytridiomycetes	0.2	Chytridiomycetes_Incertae sedis	0.2	Rhizophydiales	0.14	Rhizophydiaceae	0.14	Rhizophydium	0.14	Rhizophydium pollinis_pini	0.14	SAP
MH019817	OTU137	1	Mortierella sp. 12NJ01	JX270447.1	99.385	1155	Zygomycota	1	Mucoromycotina	1	Mucoromycotina_Incertae sedis	1	Mucoromycotina_Incertae sedis	1	Mortierellales	1	Mortierellaceae	1	Mortierella	1	Mortierella exigua	0.72	SAP
MH019818	OTU138	1	Clavulina sp. isolate 162	KY611396.1	90.583	915	Basidiomycota	1	Agaricomycotina	1	Agaricomycetes	1	Agaricomycetes_Incertae sedis	1	Cantharellales	0.99	Clavulinaceae	0.97	Clavulina	0.97	Clavulina sprucei	0.69	ECM
MH019821	OTU140	1	Lecythophora sp. YP363	JX910080.1	99.458	976	Ascomycota	1	Pezizomycotina	1	Sordariomycetes	1	Sordariomycetidae	1	Sordariales	1	Lasiosphaeriaceae	0.98	Fimetariella	0.98	Fimetariella rabenhorstii	0.98	coprophilous
MH019823	OTU142	1	Trichaptum biforme	U63473.1	99.857	1256	Basidiomycota	1	Agaricomycotina	1	Agaricomycetes	1	Agaricomycetes_Incertae sedis	1	Polyporales	1	Polyporaceae	1	Trichaptum	1	Trichaptum biforme	1	wood decay
MH019824	OTU143	1	Cercospora glycinicola CPC 23912	NR_147293.1	98.945	829	Ascomycota	1	Pezizomycotina	1	Dothideomycetes	1	Dothideomycetidae	1	Capnodiales	1	Mycosphaerellaceae	1	Mycosphaerella	1	Cercospora apii	0.88	pathogen
MH019826	OTU145	1	Ruhlandiella sp. RH-2012 voucher FLAS:MES-581	JX414210.1	93.643	875	Ascomycota	0.96	Pezizomycotina	0.96	Pezizomycetes	0.93	Pezizomycetidae	0.93	Pezizales	0.93	Pezizaceae	0.93	Peziza	0.6	Peziza depressa	0.53	ECM
MH019827	OTU146	1	Rickenella minuta strain MES1558	KY559320.1	91.757	650	Basidiomycota	0.96	Agaricomycotina	0.94	Agaricomycetes	0.94	Agaricomycetidae	0.62	Agaricales	0.51	Tricholomataceae	0.12	Tricholoma	0.09	Tricholoma magnivelare	0.05	uncertain
MH019828	OTU147	1	Saccharomyces cerevisiae strain AUMC 10233	KX029123.1	89.231	857	Ascomycota	1	Saccharomycotina	1	Saccharomycetes	1	Saccharomycetidae	1	Saccharomycetales	1	Saccharomycetaceae	1	Saccharomyces	1	Saccharomyces boulardii	0.95	YEAST
MH019830	OTU149	1	Athelia decipiens	JQ358800.1	99.51	1094	Basidiomycota	1	Agaricomycotina	1	Agaricomycetes	1	Agaricomycetidae	1	Atheliales	1	Atheliaceae	1	Athelia	1	Athelia decipiens	1	wood decay
MH019832	OTU150	1	Penicillium olsonii isolate A59B	JQ781797.1	96.252	825	Ascomycota	1	Pezizomycotina	1	Eurotiomycetes	1	Eurotiomycetidae	1	Eurotiales	1	Trichocomaceae	1	Penicillium	1	Penicillium olsonii	1	SAP
MH019834	OTU152	1	Rhodotorula kratochvilovae culture-collection CBS:5992	KY104789.1	94.316	872	Basidiomycota	1	Pucciniomycotina	1	Microbotryomycetes	1	Microbotryomycetes_Incertae sedis	1	Sporidiobolales	1	Sporidiobolales_Incertae sedis	1	Rhodosporidium	1	Rhodosporidium kratochvilovae	1	YEAST
MH019835	OTU153	1	Cenococcum geophilum clone Simb153s16A-2	EU557322.1	92.431	637	Ascomycota	1	Pezizomycotina	1	Dothideomycetes	1	Dothideomycetes_Incertae sedis	1	Dothideomycetes_Incertae sedis	1	Gloniaceae	1	Cenococcum	1	Cenococcum geophilum	0.62	ECM
MH019836	OTU154	1	Gymnohydnotrya sp. voucher MES-577	KY462684.1	94.424	856	Ascomycota	0.91	Pezizomycotina	0.91	Pezizomycetes	0.58	Pezizomycetidae	0.58	Pezizales	0.58	Tuberaceae	0.34	Labyrinthomyces	0.05	Labyrinthomyces sp JT27750	0.05	ECM
MH019837	OTU155	1	Cortinarius teraturgus IB19630218	AF389151.1	98.718	1090	Basidiomycota	1	Agaricomycotina	1	Agaricomycetes	1	Agaricomycetidae	1	Agaricales	1	Cortinariaceae	1	Cortinarius	0.96	Cortinarius alienatus	0.47	ECM
MH019838	OTU156	1	Fomes fomentarius isolate FS656174	HM584810.1	100	1034	Basidiomycota	1	Agaricomycotina	1	Agaricomycetes	1	Agaricomycetes_Incertae sedis	1	Polyporales	1	Polyporaceae	1	Fomes	1	Fomes fomentarius	1	wood decay
MH019839	OTU157	1	Sistotrema citriforme	KF218962.1	83.31	704	Basidiomycota	0.98	Agaricomycotina	0.91	Agaricomycetes	0.89	Agaricomycetes_Incertae sedis	0.86	Cantharellales	0.83	Clavulinaceae	0.77	Clavulina	0.77	Clavulina sprucei	0.55	ECM
MH019840	OTU158	1	Porpoloma sejunctum strain Singer M256 voucher MICH:00011835	KJ417302.1	99.015	1074	Basidiomycota	1	Agaricomycotina	1	Agaricomycetes	1	Agaricomycetidae	1	Agaricales	1	Tricholomataceae	0.89	Tricholoma	0.68	Tricholoma scalpturatum	0.33	ECM
MH019841	OTU159	1	Mucoromycotina sp. BEA-2010 isolate B4	HM589383.1	82.428	596	Zygomycota	1	Mucoromycotina	1	Mucoromycotina_Incertae sedis	1	Mucoromycotina_Incertae sedis	1	Mortierellales	1	Mortierellaceae	1	Mortierella	1	Mortierella globulifera	0.86	SAP
MH019843	OTU160	1	Pleurotus djamor strain CBS 665.85	EU424288.1	99.853	1225	Basidiomycota	1	Agaricomycotina	1	Agaricomycetes	1	Agaricomycetidae	1	Agaricales	1	Pleurotaceae	1	Pleurotus	1	Pleurotus flabellatus	0.98	SAP
MH019844	OTU161	1	Aleurina sp. voucher MES-1336	KY462463.1	93.255	504	Ascomycota	0.61	Pezizomycotina	0.55	Lecanoromycetes	0.15	Lecanoromycetidae	0.15	Lecanorales	0.11	Parmeliaceae	0.08	Xanthoparmelia	0.07	Xanthoparmelia idahoensis	0.07	uncertain
MH019845	OTU162	1	Chaetothyriales sp. EF801	LC130992.1	87.97	654	Ascomycota	1	Pezizomycotina	1	Eurotiomycetes	0.75	Chaetothyriomycetidae	0.75	Chaetothyriales	0.4	Herpotrichiellaceae	0.31	Cladophialophora	0.29	Cladophialophora scillae	0.19	DSE
MH019846	OTU163	1	Hydropus funebris voucher PDD:87227	JQ694112.1	90.741	937	Basidiomycota	1	Agaricomycotina	1	Agaricomycetes	1	Agaricomycetidae	0.95	Agaricales	0.95	Mycenaceae	0.47	Mycena	0.47	Mycena corynephora	0.45	SAP
MH019847	OTU164	1	Fuscoporia sp. DLL2009-052	JQ673157.1	97.068	1023	Basidiomycota	1	Agaricomycotina	1	Agaricomycetes	1	Agaricomycetes_Incertae sedis	1	Hymenochaetales	1	Hymenochaetaceae	1	Phellinus	1	Fuscoporia ferruginosa	1	pathogen/wood decay
MH019848	OTU165	1	Cortinarius sp. PDD 88258	KJ635227.1	88.254	783	Basidiomycota	1	Agaricomycotina	1	Agaricomycetes	1	Agaricomycetidae	1	Agaricales	1	Cortinariaceae	1	Cortinarius	1	Cortinarius cycneus	0.71	ECM
MH019849	OTU166	1	Cortinarius sp. PDD 88258	KJ635227.1	76.857	425	Basidiomycota	1	Agaricomycotina	1	Agaricomycetes	1	Agaricomycetidae	1	Agaricales	1	Cortinariaceae	1	Cortinarius	0.92	Cortinarius neosanguineus	0.24	ECM
MH019851	OTU168	1	Rhodotorula nothofagi strain IWBT-Y803	JQ993368.1	98.592	985	Basidiomycota	1	Pucciniomycotina	1	Microbotryomycetes	1	Microbotryomycetes_Incertae sedis	1	Sporidiobolales	1	Sporidiobolales_Incertae sedis	1	Rhodotorula	1	Rhodotorula nothofagi	1	YEAST
MH019852	OTU169	1	Bovista tomentosa voucher MJ3874	KT958936.1	99.058	1119	Basidiomycota	1	Agaricomycotina	1	Agaricomycetes	1	Agaricomycetidae	1	Agaricales	1	Lycoperdaceae	1	Bovista	0.76	Bovista paludosa	0.67	SAP
MH019854	OTU170	1	Cryptococcus magnus strain P2	KF667113.1	100	1067	Basidiomycota	1	Agaricomycotina	1	Tremellomycetes	1	Tremellomycetidae	1	Tremellales	1	Tremellaceae	1	Cryptococcus	1	Cryptococcus magnus	1	SAP
MH019855	OTU171	1	Penicillium miczynskii FRR 1077	NR_077156.1	99.458	975	Ascomycota	1	Pezizomycotina	1	Eurotiomycetes	1	Eurotiomycetidae	1	Eurotiales	1	Trichocomaceae	1	Penicillium	1	Penicillium miczynskii	0.38	SAP
MH019856	OTU172	1	Ramariopsis cf. subtilis isolate HA11	KY706174.1	86.4	686	Basidiomycota	1	Agaricomycotina	1	Agaricomycetes	1	Agaricomycetidae	1	Agaricales	0.99	Clavariaceae	0.76	Clavulinopsis	0.76	Clavulinopsis luteoalba	0.39	likely ECM
MH019857	OTU173	1	Chaetomium acropullum isolate J1-2	KP994323.1	100	948	Ascomycota	1	Pezizomycotina	1	Sordariomycetes	1	Sordariomycetidae	1	Sordariales	1	Chaetomiaceae	1	Chaetomium	1	Chaetomium subaffine	0.77	SAP
MH019858	OTU174	1	Cladosporium sphaerospermum strain Cla02	AB572904.1	100	937	Ascomycota	1	Pezizomycotina	1	Dothideomycetes	1	Dothideomycetidae	1	Capnodiales	1	Mycosphaerellaceae	1	Cladosporium	1	Cladosporium halotolerans	1	SAP
MH019859	OTU175	1	Athelia sp. UC2022898	KP814461.1	92.509	783	Basidiomycota	1	Agaricomycotina	1	Agaricomycetes	1	Agaricomycetidae	0.99	Atheliales	0.94	Atheliaceae	0.94	Fibulorhizoctonia	0.52	Fibulorhizoctonia sp TMB	0.52	SAP
MH019860	OTU176	1	Mortierella fimbricystis strain P5_10_1_F	KP411579.1	95.674	942	Zygomycota	1	Mucoromycotina	1	Mucoromycotina_Incertae sedis	1	Mucoromycotina_Incertae sedis	1	Mortierellales	1	Mortierellaceae	1	Mortierella	1	Mortierella macrocystis	0.5	SAP
MH019861	OTU177	1	Cortinarius sp. voucher MES-1247	KY462446.1	94.942	807	Basidiomycota	1	Agaricomycotina	1	Agaricomycetes	1	Agaricomycetidae	1	Agaricales	1	Cortinariaceae	1	Cortinarius	1	Cortinarius cycneus	0.32	ECM
MH019862	OTU178	1	Cyberlindnera jadinii culture-collection CBS:840	KY103049.1	99.42	919	Ascomycota	1	Saccharomycotina	1	Saccharomycetes	1	Saccharomycetidae	1	Saccharomycetales	1	Pichiaceae	1	Pichia	1	Pichia jadinii	1	YEAST
MH019863	OTU179	1	Sistotrema oblongisporum	KF218970.1	82.003	589	Basidiomycota	1	Agaricomycotina	1	Agaricomycetes	0.98	Agaricomycetes_Incertae sedis	0.92	Cantharellales	0.58	Clavulinaceae	0.45	Clavulina	0.45	Clavulina sprucei	0.42	ECM
MH019865	OTU180	1	Aleurina argentina voucher DHP-CH1	KC905032.1	94.03	820	Ascomycota	0.8	Pezizomycotina	0.75	Pezizomycetes	0.35	Pezizomycetidae	0.35	Pezizales	0.35	Pyronemataceae	0.22	Trichophaea	0.06	Trichophaea hybrida	0.06	likely ECM
MH019866	OTU181	1	Schizophyllum commune	AB369910.1	100	1141	Basidiomycota	1	Agaricomycotina	1	Agaricomycetes	1	Agaricomycetidae	1	Agaricales	1	Schizophyllaceae	1	Schizophyllum	1	Schizophyllum commune	1	SAP
MH019867	OTU182	1	Cortinarius sp. PDD 107719	KT875196.1	99.023	1077	Basidiomycota	1	Agaricomycotina	1	Agaricomycetes	1	Agaricomycetidae	1	Agaricales	1	Cortinariaceae	1	Cortinarius	1	Cortinarius iringa	1	ECM
MH019868	OTU183	1	Sporocadus populinus	KP979113.1	94.183	686	Ascomycota	1	Pezizomycotina	1	Dothideomycetes	1	Pleosporomycetidae	1	Pleosporales	1	Venturiaceae	1	Venturia	0.78	Venturia tremulae	0.25	pathogen
MH019869	OTU184	1	Coniochaeta canina UTHSC 11-2460	NR_120211.1	96.846	890	Ascomycota	1	Pezizomycotina	1	Sordariomycetes	1	Sordariomycetidae	1	Coniochaetales	1	Coniochaetaceae	1	Lecythophora	0.73	Lecythophora fasciculata	0.41	SAP
MH019870	OTU185	1	Aspergillus niger isolate F48-02	KX664417.1	91.667	801	Ascomycota	1	Pezizomycotina	1	Eurotiomycetes	1	Eurotiomycetidae	1	Eurotiales	1	Trichocomaceae	1	Aspergillus	0.99	Aspergillus niger	0.78	SAP
MH019896	OTU41	1	Penicillium sp. AP-2015	KT898129.1	94.989	688	Ascomycota	1	Pezizomycotina	1	Eurotiomycetes	1	Eurotiomycetidae	1	Eurotiales	1	Trichocomaceae	1	Penicillium	0.99	Penicillium jamesonlandense	0.78	SAP
MH019897	OTU42	1	Phialocephala sp. BSB_59mbsf	LC199390.1	99.671	1086	Ascomycota	1	Pezizomycotina	1	Leotiomycetes	1	Leotiomycetidae	1	Helotiales	1	Helotiaceae	1	Cadophora	1	Cadophora malorum	0.82	DSE
MH019898	OTU43	1	Cortinarius sp. PDD 88258	KJ635227.1	80.617	522	Basidiomycota	1	Agaricomycotina	1	Agaricomycetes	1	Agaricomycetidae	1	Agaricales	1	Cortinariaceae	0.99	Cortinarius	0.97	Cortinarius viscoviridis	0.21	ECM
MH019899	OTU44	1	Amyloporia xantha culture-collection ICMP:13871	KY111245.1	100	989	Basidiomycota	1	Agaricomycotina	1	Agaricomycetes	1	Agaricomycetes_Incertae sedis	1	Polyporales	1	Fomitopsidaceae	1	Antrodia	1	Antrodia xantha	1	wood decay
MH019903	OTU48	1	Tomentella bryophila isolate FFP1020	JQ711917.1	91.916	951	Basidiomycota	1	Agaricomycotina	1	Agaricomycetes	1	Agaricomycetes_Incertae sedis	1	Thelephorales	1	Thelephoraceae	1	Tomentella	0.95	Tomentella viridula	0.19	ECM
MH019906	OTU50	1	Fontanospora eccentrica strain CCM F-11513	KP234354.1	96.903	908	Ascomycota	1	Pezizomycotina	1	Dothideomycetes	0.5	Pleosporomycetidae	0.5	Pleosporales	0.5	Pleosporales_Incertae sedis	0.5	Anguillospora	0.5	Anguillospora filiformis	0.5	pathogen or SAP
MH019910	OTU54	1	Inocybe sp. voucher MES-1717	KY462533.1	85.952	607	Basidiomycota	1	Agaricomycotina	1	Agaricomycetes	1	Agaricomycetidae	1	Agaricales	1	Inocybaceae	1	Inocybe	1	Inocybe auricoma	0.23	ECM
MH019914	OTU58	1	Pseudeurotium bakeri isolate BSB_10mbsf	LC199386.1	99.042	913	Ascomycota	1	Pezizomycotina	1	Dothideomycetes	1	Dothideomycetes_Incertae sedis	1	Dothideomycetes_Incertae sedis	1	Pseudeurotiaceae	1	Teberdinia	1	Pseudeurotium sp BEA_2010 A2	0.38	pathogen or SAP
MH019919	OTU62	1	Schizopora sp. voucher CFMR:FP-170198	KU668955.1	99.208	1115	Basidiomycota	1	Agaricomycotina	1	Agaricomycetes	1	Agaricomycetes_Incertae sedis	1	Polyporales	1	Polyporaceae	1	Trichaptum	1	Trichaptum biforme	1	pathogen
MH019920	OTU63	1	Descolea sp. ABM-2017b voucher MES-1687	KY523094.1	76.471	410	Basidiomycota	0.56	Agaricomycotina	0.53	Agaricomycetes	0.53	Agaricomycetidae	0.5	Agaricales	0.49	Cortinariaceae	0.18	Gymnopilus	0.07	Gymnopilus picreus	0.07	ECM
MH019921	OTU64	1	Pseudotomentella larsenii	AF326981.1	82.149	578	Basidiomycota	0.97	Agaricomycotina	0.95	Agaricomycetes	0.95	Agaricomycetes_Incertae sedis	0.91	Thelephorales	0.89	Thelephoraceae	0.89	Tomentellopsis	0.29	Tomentellopsis submollis	0.23	ECM
MH019922	OTU65	1	Dothideomycetes sp. 11387	GQ153264.1	94.828	729	Ascomycota	1	Pezizomycotina	1	Dothideomycetes	1	Pleosporomycetidae	0.95	Pleosporales	0.95	Pleosporales_Incertae sedis	0.53	Pyrenochaeta	0.3	Pyrenochaeta gentianicola	0.29	uncertain
MH019923	OTU66	1	Candida viswanathii ATCC 22981	NR_138345.1	99.165	839	Ascomycota	1	Saccharomycotina	1	Saccharomycetes	1	Saccharomycetidae	1	Saccharomycetales	1	Saccharomycetales_Incertae sedis	1	Candida	1	Candida aquae_textoris	1	YEAST
MH019924	OTU67	1	Penicillium brevicompactum strain IHBF 2254	MF326601.1	96.247	737	Ascomycota	1	Pezizomycotina	1	Eurotiomycetes	1	Eurotiomycetidae	1	Eurotiales	1	Trichocomaceae	1	Penicillium	1	Penicillium biourgeianum	1	SAP
MH019925	OTU68	1	Sporidiobolales sp. G5	JN636813.1	91.021	776	Basidiomycota	1	Pucciniomycotina	1	Microbotryomycetes	1	Microbotryomycetes_Incertae sedis	1	Sporidiobolales	1	Sporidiobolales_Incertae sedis	0.99	Rhodotorula	0.97	Rhodotorula colostri	0.97	YEAST
MH019929	OTU71	1	Cryptococcus aff. flavus DSM 101939 isolate RP316_4	KX067799.1	99.185	865	Basidiomycota	1	Agaricomycotina	1	Tremellomycetes	1	Tremellomycetidae	1	Tremellales	1	Tremellaceae	1	Cryptococcus	1	Cryptococcus paraflavus	1	SAP
MH019930	OTU72	1	Aleurina argentina voucher DHP-CH1	KC905032.1	94.737	830	Chytridiomycota	0.23	Chytridiomycota_Incertae sedis	0.23	Chytridiomycetes	0.23	Chytridiomycetes_Incertae sedis	0.23	Spizellomycetales	0.16	Spizellomycetaceae	0.16	Spizellomyces	0.14	Spizellomyces dolichospermus	0.11	uncertain
MH019931	OTU73	1	Tulasnella sp. voucher MES-2153	KY462672.1	97.24	1032	Basidiomycota	0.86	Agaricomycotina	0.68	Agaricomycetes	0.66	Agaricomycetidae	0.55	Agaricales	0.39	Agaricaceae	0.07	Macrolepiota	0.05	Macrolepiota fuliginosa	0.05	uncertain
MH019932	OTU74	1	Cortinarius sp. PDD 88258	KJ635227.1	91.214	850	Basidiomycota	1	Agaricomycotina	1	Agaricomycetes	1	Agaricomycetidae	1	Agaricales	1	Cortinariaceae	1	Cortinarius	1	Cortinarius viscoviridis	0.36	ECM
MH019933	OTU75	1	Hyaloscyphaceae sp. KO-groupC 2014	AB986375.1	91.189	679	Ascomycota	1	Pezizomycotina	1	Leotiomycetes	0.86	Leotiomycetidae	0.76	Helotiales	0.76	Helotiaceae	0.46	Leptodontidium	0.45	Leptodontidium elatius	0.45	DSE
MH019935	OTU77	1	Tomentella sp. 'LT56'	U83482.1	94.88	1036	Basidiomycota	1	Agaricomycotina	1	Agaricomycetes	1	Agaricomycetes_Incertae sedis	1	Thelephorales	1	Thelephoraceae	1	Tomentella	1	Tomentella lateritia	0.54	ECM
MH019937	OTU79	1	Exobasidium japonicum strain CGMCC 5.1650	EU692768.1	83.531	601	Basidiomycota	1	Ustilaginomycotina	1	Exobasidiomycetes	1	Exobasidiomycetes_Incertae sedis	1	Exobasidiales	0.99	Exobasidiaceae	0.99	Exobasidium	0.99	Exobasidium pentasporium	0.57	SAP
MH019939	OTU80	1	Alternaria sp. DCL-2013	JX235958.1	95.66	886	Ascomycota	1	Pezizomycotina	1	Dothideomycetes	1	Pleosporomycetidae	1	Pleosporales	1	Pleosporaceae	1	Embellisia	0.99	Embellisia phragmospora	0.99	pathogen or SAP
MH019941	OTU82	1	Aleurina argentina voucher DHP-CH1	KC905032.1	93.003	856	Ascomycota	0.86	Pezizomycotina	0.82	Pezizomycetes	0.25	Pezizomycetidae	0.25	Pezizales	0.25	Pyronemataceae	0.14	Genea	0.05	Genea verrucosa	0.05	ECM
MH019944	OTU85	1	Cortinarius xenosma voucher PDD:101822	KJ635207.1	94.315	1041	Basidiomycota	1	Agaricomycotina	1	Agaricomycetes	1	Agaricomycetidae	1	Agaricales	1	Cortinariaceae	1	Cortinarius	0.96	Cortinarius cycneus	0.21	ECM
MH019945	OTU86	1	Aleurina argentina voucher DHP-CH1	KC905032.1	90.925	801	Ascomycota	0.46	Pezizomycotina	0.45	Pezizomycetes	0.18	Pezizomycetidae	0.18	Pezizales	0.18	Pyronemataceae	0.06	Trichophaea	0.03	Trichophaea hybrida	0.03	ECM
MH019946	OTU87	1	Alpinaria rhododendri WU 36914	NR_147686.1	97.905	893	Ascomycota	1	Pezizomycotina	1	Dothideomycetes	1	Pleosporomycetidae	0.89	Pleosporales	0.89	Lophiostomataceae	0.89	Herpotrichia	0.89	Herpotrichia juniperi	0.89	pathogen
MH019947	OTU88	1	Marssonina brunnea f. sp. 'monogermtubi' strain RBHB1	KM246347.1	97.312	935	Ascomycota	0.99	Pezizomycotina	0.99	Leotiomycetes	0.77	Leotiomycetidae	0.77	Helotiales	0.77	Helotiales_Incertae sedis	0.55	Thedgonia	0.55	Thedgonia ligustrina	0.55	uncertain
MH019948	OTU89	1	Aleurina echinata voucher DHP-CH21	KC905033.1	93.707	886	Ascomycota	0.71	Saccharomycotina	0.29	Saccharomycetes	0.29	Saccharomycetidae	0.29	Saccharomycetales	0.29	Saccharomycetaceae	0.22	Kazachstania	0.14	Kazachstania hellenica	0.1	uncertain
MH019951	OTU91	1	Tricholoma sp. voucher CT-4370	KY462348.1	92.395	760	Basidiomycota	1	Agaricomycotina	1	Agaricomycetes	1	Agaricomycetidae	1	Agaricales	1	Tricholomataceae	1	Tricholoma	1	Tricholoma fulvum	0.48	ECM
MH019952	OTU92	1	Inocybe sp. PBM3086 voucher PDD:97895	KP636844.1	85.431	773	Basidiomycota	1	Agaricomycotina	1	Agaricomycetes	1	Agaricomycetidae	1	Agaricales	1	Inocybaceae	1	Inocybe	1	Inocybe fibrillosibrunnea	0.47	ECM
MH019954	OTU94	1	Olpidium brassicae isolate MX-O6	EU981899.1	90.303	224	Basidiomycota	0.5	Agaricomycotina	0.41	Agaricomycetes	0.39	Agaricomycetes_Incertae sedis	0.18	Cantharellales	0.1	Hydnaceae	0.09	Hydnum	0.09	Hydnum ellipsosporum	0.05	uncertain
MH019957	OTU97	1	Cortinarius sp. voucher MES-1247	KY462446.1	94.352	926	Basidiomycota	1	Agaricomycotina	1	Agaricomycetes	1	Agaricomycetidae	1	Agaricales	1	Cortinariaceae	1	Cortinarius	0.99	Cortinarius cycneus	0.47	ECM
MH019959	OTU99	1	Gloeoporus dichrous voucher KUC20131001-30	KJ668541.1	99.444	953	Basidiomycota	1	Agaricomycotina	1	Agaricomycetes	1	Agaricomycetes_Incertae sedis	1	Polyporales	1	Meruliaceae	0.84	Gloeoporus	0.83	Gloeoporus pannocinctus	0.83	wood decay
